# Supplementary material for: Conversion of Similar Xenochemicals to Dissimilar Products: Exploiting Competing Reactions in Whole-Cell Catalysis
Source: MDPI journal article supplement (doi:10.3390/molecules28135157), 2023-07-01
Supplement: s1 [file s1]

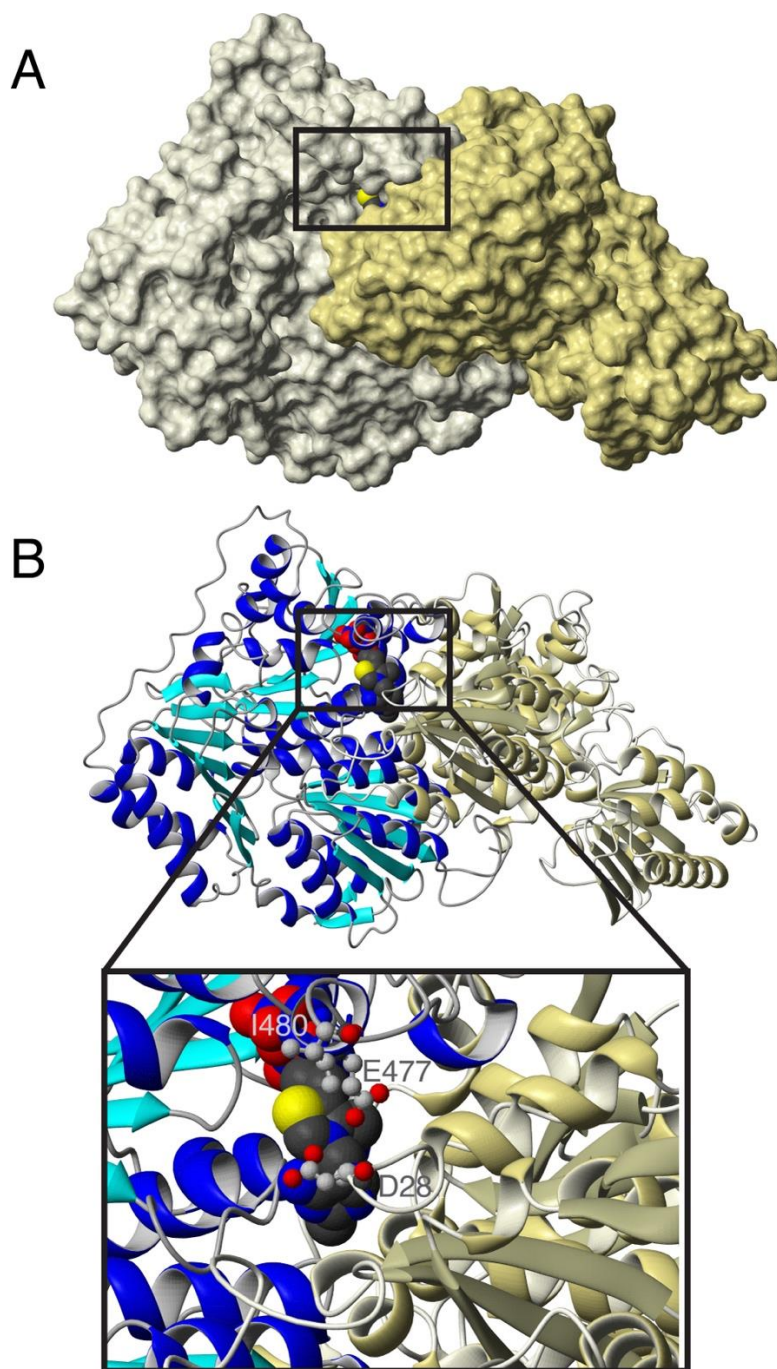

**Figure S1.** (A) Surface representation of monomer interface in *S. cerevisiae* pyruvate decarboxylase (EC 4.1.1.1) (coordinates from a 2.3 Å crystal structure; PDB code 1PVD). Two monomers are in the asymmetric unit, while the protein occurs as a dimer of dimers, with the active site located at the end of a narrow crevice between two monomers (highlighted by a black frame). (B) Ribbon representation in the same orientation, with a zoom onto the active site and some flanking amino acids (D28 from a neighboring monomer). The thiamine diphosphate cofactor is shown in space filling representation.

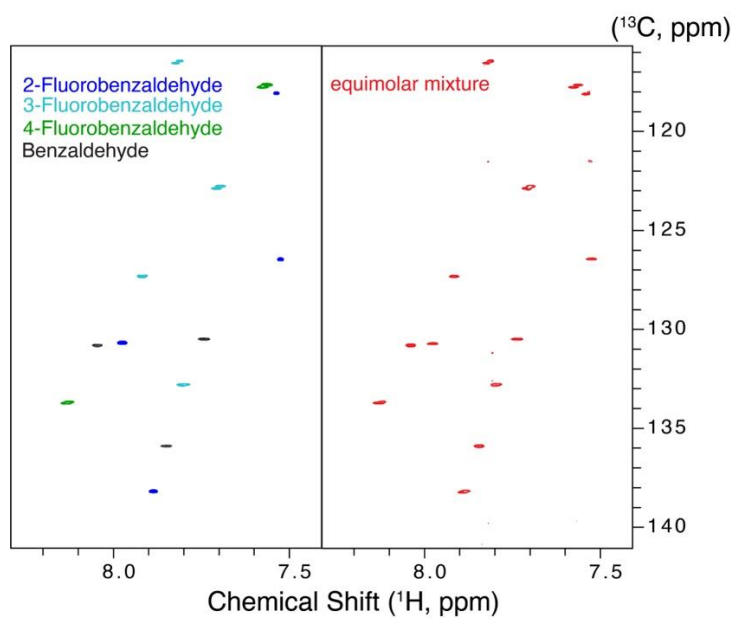

**Figure S2.** Aromatic region of  $^1\text{H}$ - $^{13}\text{C}$  HSQC spectra of distilled benzaldehyde and of 2-, 3-, or 4-fluorobenzaldehyde shown in overlay (left) as well as an equimolar quaternary mixture of all four aromatic aldehydes used for competition assays (right).

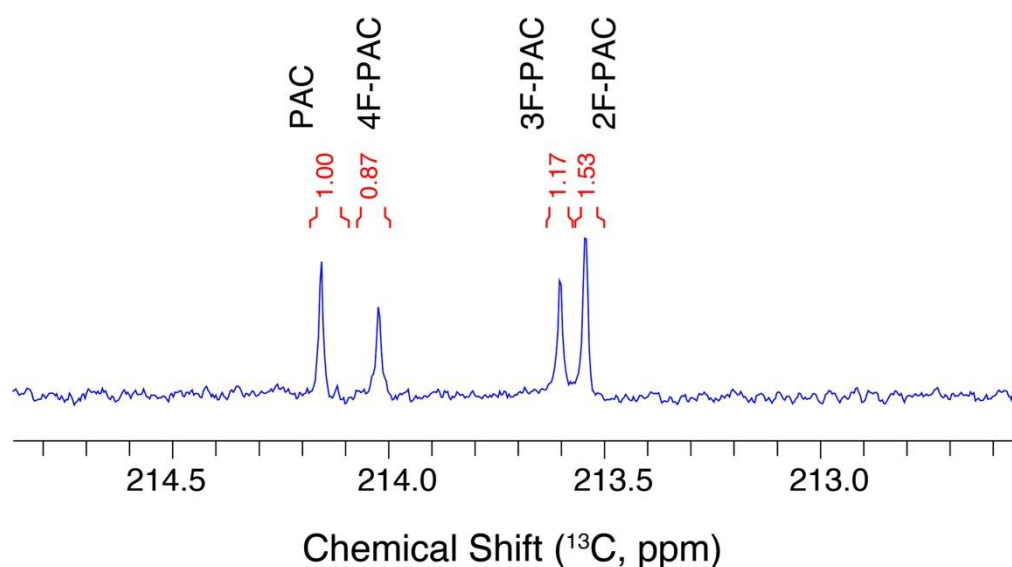

**Figure S3.** Formation of PACs from an equimolar mixture of unsubstituted and monofluorinated benzaldehydes and 1 unit of *S. cerevisiae* pyruvate decarboxylase, showing altered selectivity relative to the use of whole cell catalysis in intracellular competition. Reaction conditions: 0.43% (w/w) of benzaldehyde and 0.5 % (w/w) of each monofluorinated benzaldehyde, 180 mM pyruvate, 550  $\mu\text{L}$  phosphate buffer (90 mM, pH 6.0, containing 1 mM  $\text{MgSO}_4$ , 10 mM KCl, 10%  $\text{D}_2\text{O}$ ), sum spectrum of first five hours of reaction.

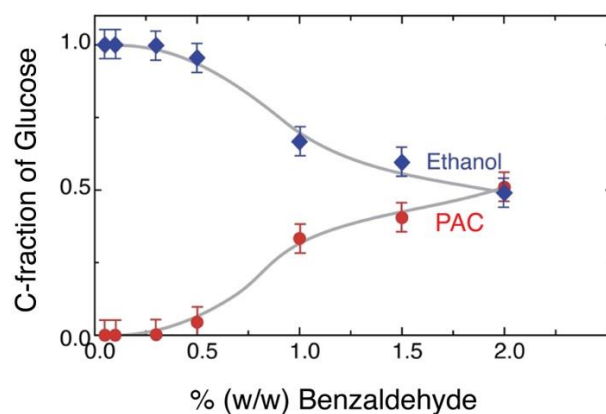

**Figure S4.** Internal competition of glucose-derived acetaldehyde for ethanol or PAC formation in dependence of weight-% benzaldehyde, showing massive redirecting of glucose carbon from alcoholic fermentation to PAC formation. Reaction conditions: variable weight-% benzaldehyde, 90 mM glucose in 550  $\mu$ L phosphate buffer (90 mM, pH 6.0, containing 1 mM  $\text{MgSO}_4$ , 10 mM KCl, 10%  $\text{D}_2\text{O}$ ), 100 mg commercial dry yeast, 303 K, 1 hour reaction time.

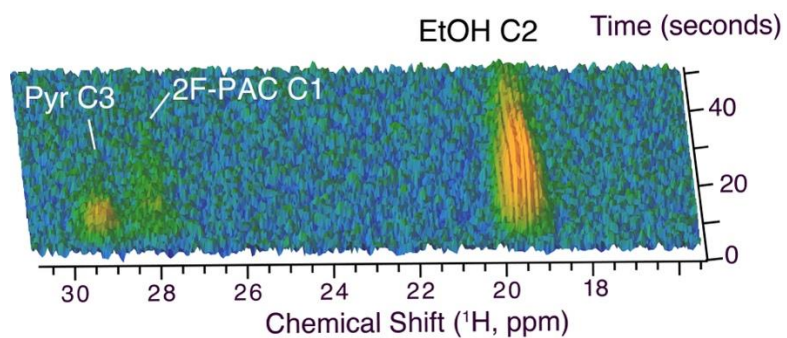

**Figure S5.** D-DNP NMR time series of  $^{13}\text{C}$  NMR 1 D spectra acquired each 0.5 seconds, showing the influx of hyperpolarized D-[U- $^{13}\text{C}$ ,U- $^2\text{H}$ ]glucose into metabolites within 30 seconds in the presence of 0.5% (w/w) 2-fluorobenzaldehyde. 2F-PAC forms rapidly, as evidenced by the emergence of its methyl signal within few seconds.

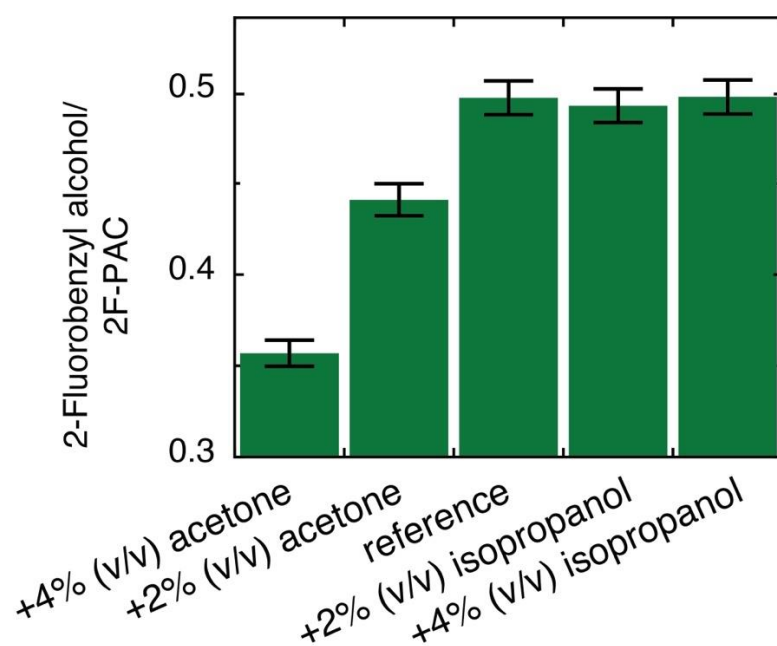

**Figure S6.** Effect of acetone and isopropanol on product distribution from 2-fluorobenzaldehyde in *S. cerevisiae*. Reaction conditions: 0.5 % (w/w) 2-fluorobenzaldehyde, 90 mM glucose, 550 mL phosphate buffer (90 mM, pH 6.0, containing 1 mM MgSO<sub>4</sub>, 10 mM KCl, 10% D<sub>2</sub>O), 100 mg commercial dry yeast, 303 K, 1 hour.

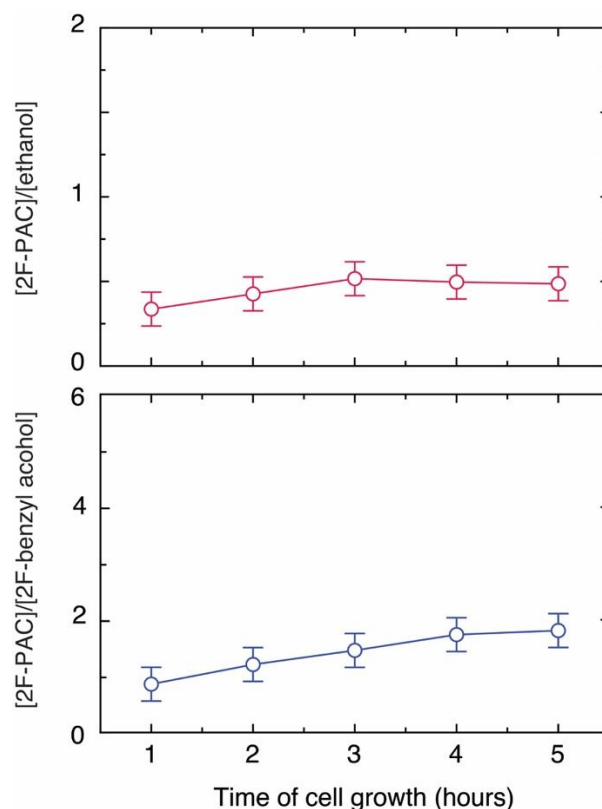

**Figure S7.** Effect of cell growth and uptake of oxidized reactant pyruvate on product distribution in the reaction between 2-fluorobenzaldehyde and glucose, akin to the reaction with pyruvate of main text Figure 9. The ratio between 2F-PAC and ethanol is plotted on the same scale as in Figure 9, while the ratio between 2F-PAC and 2-fluorobenzyl alcohol is plotted on a smaller scale than in Figure 9 due to significantly lower ratio. Reaction conditions: Preincubation of 100 mg commercial dry yeast in YPD for variable time, subsequent reaction of 0.5 % (w/w) 2-fluorobenzaldehyde, 90 mM glucose, identical number of cells in 550  $\mu$ L phosphate buffer (90 mM, pH 6.0, containing 1 mM  $\text{MgSO}_4$ , 10 mM KCl, 10%  $\text{D}_2\text{O}$ ), 303 K, 1 hour.

**Table S1.** Full  $^1\text{H}$  and  $^{13}\text{C}$  chemical shift assignments of benzaldehyde and its acyloin condensation product after whole cell catalysis with commercial yeast, as well as alcohol and acid in  $\text{H}_2\text{O}$  at 298 K.

| Benzaldehyde                                                                        | Carbon | $\delta^1\text{H}$ (ppm) | $\delta^{13}\text{C}$ (ppm) |
|-------------------------------------------------------------------------------------|--------|--------------------------|-----------------------------|
| 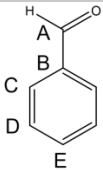   | A      | 9.92                     | 199.3                       |
|                                                                                     | B      | -                        | 138.2                       |
|                                                                                     | C      | 7.94                     | 132.8                       |
|                                                                                     | D      | 7.62                     | 131.9                       |
|                                                                                     | E      | 7.75                     | 138.1                       |
| PAC                                                                                 | Carbon | $\delta^1\text{H}$ (ppm) | $\delta^{13}\text{C}$ (ppm) |
|    | A      | 2.09                     | 28.2                        |
|                                                                                     | B      | -                        | 214.1                       |
|                                                                                     | C      | 5.37                     | 82.3                        |
|                                                                                     | D      | -                        | 139.8                       |
|                                                                                     | E      | 7.41                     | 130.3                       |
|                                                                                     | F      | 7.62                     | 131.8                       |
|                                                                                     | G      | 7.75                     | 138.1                       |
| Benzyl alcohol                                                                      | Carbon | $\delta^1\text{H}$ (ppm) | $\delta^{13}\text{C}$ (ppm) |
|   | A      | 4.63                     | 66.6                        |
|                                                                                     | B      | -                        | 142.9                       |
|                                                                                     | C      | 7.40                     | 130.2                       |
|                                                                                     | D      | 7.36                     | 130.5                       |
|                                                                                     | E      | 7.31                     | 132.0                       |
| Benzoic acid                                                                        | Carbon | $\delta^1\text{H}$ (ppm) | $\delta^{13}\text{C}$ (ppm) |
|  | A      | -                        | 178.2                       |
|                                                                                     | B      | -                        | 133.8                       |
|                                                                                     | C      | 7.86                     | 131.4                       |
|                                                                                     | D      | 7.47                     | 130.9                       |
|                                                                                     | E      | 7.54                     | 133.9                       |



**Table S2.** Full  $^1\text{H}$  and  $^{13}\text{C}$  chemical shift assignments of 2-fluorobenzaldehyde and its acyloin condensation product after whole cell catalysis with commercial yeast, as well as alcohol and acid in  $\text{H}_2\text{O}$  at 298 K.

| 2-fluorobenzaldehyde                                                                | Carbon | $\delta^1\text{H}$ (ppm) | $\delta^{13}\text{C}$ (ppm) |
|-------------------------------------------------------------------------------------|--------|--------------------------|-----------------------------|
| 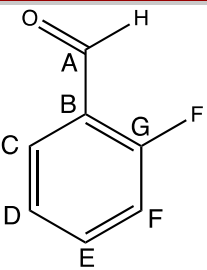   | A      | 10.18                    | 194.4                       |
|                                                                                     | B      | -                        | 126.2                       |
|                                                                                     | C      | 7.87                     | 132.6                       |
|                                                                                     | D      | 7.38                     | 127.5                       |
|                                                                                     | E      | 7.74                     | 140.0                       |
|                                                                                     | F      | 7.3                      | 119.2                       |
|                                                                                     | G      | -                        | 166.7                       |
|                                                                                     |        |                          |                             |
| 2F-PAC                                                                              | Carbon | $\delta^1\text{H}$ (ppm) | $\delta^{13}\text{C}$ (ppm) |
|    | A      | 2.14                     | 28.1                        |
|                                                                                     | B      | -                        | 213.7                       |
|                                                                                     | C      | 5.54                     | 77.0                        |
|                                                                                     | D      | -                        | 129.5                       |
|                                                                                     | E      | 7.39                     | 132.5                       |
|                                                                                     | F      | 7.27                     | 127.7                       |
|                                                                                     | G      | 7.46                     | 134.0                       |
|                                                                                     | H      | 7.22                     | 118.8                       |
|                                                                                     | I      | -                        | 162.9                       |
|                                                                                     |        |                          |                             |
| 2-fluorobenzyl alcohol                                                              | Carbon | $\delta^1\text{H}$ (ppm) | $\delta^{13}\text{C}$ (ppm) |
|  | A      | 4.69                     | 60.7                        |
|                                                                                     | B      | -                        | 129.6                       |
|                                                                                     | C      | 7.43                     | 132.8                       |
|                                                                                     | D      | 7.22                     | 127.1                       |
|                                                                                     | E      | 7.39                     | 132.6                       |
|                                                                                     | F      | 7.17                     | 118.1                       |
|                                                                                     | G      | -                        | 163.3                       |
|                                                                                     |        |                          |                             |
| 2-fluorobenzoic acid                                                                | Carbon | $\delta^1\text{H}$ (ppm) | $\delta^{13}\text{C}$ (ppm) |
|  | A      | -                        | 171.4                       |
|                                                                                     | B      | -                        | 121.4                       |
|                                                                                     | C      | 7.89                     | 134.4                       |
|                                                                                     | D      | 7.30                     | 127.2                       |
|                                                                                     | E      | 7.64                     | 138.0                       |
|                                                                                     | F      | 7.25                     | 119.4                       |
|                                                                                     | G      | -                        | 164.1                       |
|                                                                                     |        |                          |                             |

**Table S3.** Full  $^1\text{H}$  and  $^{13}\text{C}$  chemical shift assignments of 3-fluorobenzaldehyde and its acyloin condensation product after whole cell catalysis with commercial yeast, as well as alcohol and acid in  $\text{H}_2\text{O}$  at 298 K.

| 3-fluorobenzaldehyde                                                                | Carbon | $\delta^1\text{H}$ (ppm) | $\delta^{13}\text{C}$ (ppm) |
|-------------------------------------------------------------------------------------|--------|--------------------------|-----------------------------|
| 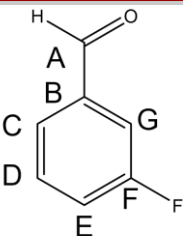   | A      | 9.92                     | 198.0                       |
|                                                                                     | B      | -                        | 140.5                       |
|                                                                                     | C      | 7.78                     | 129.4                       |
|                                                                                     | D      | 7.63                     | 133.9                       |
|                                                                                     | E      | 7.49                     | 124.8                       |
|                                                                                     | F      | -                        | 165.5                       |
|                                                                                     | G      | 7.65                     | 118.2                       |
|                                                                                     |        |                          |                             |
| 3F-PAC                                                                              | Carbon | $\delta^1\text{H}$ (ppm) | $\delta^{13}\text{C}$ (ppm) |
|    | A      | 2.11                     | 28.1                        |
|                                                                                     | B      | -                        | 213.3                       |
|                                                                                     | C      | 5.37                     | 81.6                        |
|                                                                                     | D      | -                        | 141.9                       |
|                                                                                     | E      | 7.23                     | 126.1                       |
|                                                                                     | F      | 7.47                     | 133.6                       |
|                                                                                     | G      | 7.17                     | 118.4                       |
|                                                                                     | H      | -                        | 165.2                       |
|                                                                                     | I      | 7.16                     | 116.8                       |
|                                                                                     |        |                          |                             |
| 3-fluorobenzyl alcohol                                                              | Carbon | $\delta^1\text{H}$ (ppm) | $\delta^{13}\text{C}$ (ppm) |
|  | A      | 4.63                     | 65.9                        |
|                                                                                     | B      | -                        | 145.4                       |
|                                                                                     | C      | 7.19                     | 125.3                       |
|                                                                                     | D      | 7.41                     | 133.1                       |
|                                                                                     | E      | 7.08                     | 117.0                       |
|                                                                                     | F      | -                        | 164.6                       |
|                                                                                     | G      | 7.13                     | 116.4                       |
|                                                                                     |        |                          |                             |
| 3-fluorobenzoic acid                                                                | Carbon | $\delta^1\text{H}$ (ppm) | $\delta^{13}\text{C}$ (ppm) |
|  | A      | -                        | 172.4                       |
|                                                                                     | B      | -                        | 135.1                       |
|                                                                                     | C      | 7.82                     | 128.1                       |
|                                                                                     | D      | 7.53                     | 133.2                       |
|                                                                                     | E      | 7.40                     | 123.1                       |
|                                                                                     | F      | -                        | 165.1                       |
|                                                                                     | G      | 7.71                     | 118.9                       |
|                                                                                     |        |                          |                             |

**Table S4.** Full  $^1\text{H}$  and  $^{13}\text{C}$  chemical shift assignments of 4-fluorobenzaldehyde and its acyloin condensation product after whole cell catalysis with commercial yeast, as well as alcohol and acid in  $\text{H}_2\text{O}$  at 298 K.

| 4-fluorobenzaldehyde                                                                | Carbon | $\delta^1\text{H}$ (ppm)       | $\delta^{13}\text{C}$ (ppm) |
|-------------------------------------------------------------------------------------|--------|--------------------------------|-----------------------------|
| 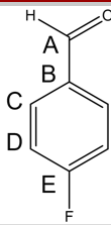   | A      | 9.88                           | 197.7                       |
|                                                                                     | B      | -                              | 135.1                       |
|                                                                                     | C      | 8.0                            | 135.5                       |
|                                                                                     | D      | 7.33                           | 119.2                       |
|                                                                                     | E      | -                              | 169.5                       |
|                                                                                     | F      | -                              | -                           |
| 4F-PAC                                                                              | Carbon | $\delta^1\text{H}$ (ppm)       | $\delta^{13}\text{C}$ (ppm) |
|    | A      | 2.10                           | 28.1                        |
|                                                                                     | B      | -                              | 214.1                       |
|                                                                                     | C      | 5.37                           | 81.5                        |
|                                                                                     | D      | -                              | 135.6                       |
|                                                                                     | E      | 7.41                           | 132.2                       |
|                                                                                     | F      | 7.19                           | 118.5                       |
|                                                                                     | G      | -                              | 165.3                       |
|                                                                                     | H      | -                              | -                           |
| 4-fluorobenzyl alcohol                                                              | Carbon | $\delta^1\text{H}$ (ppm)       | $\delta^{13}\text{C}$ (ppm) |
|   | A      | 4.60                           | 65.9                        |
|                                                                                     | B      | -                              | 138.6                       |
|                                                                                     | C      | 7.39                           | 132.1                       |
|                                                                                     | D      | 7.13                           | 117.9                       |
|                                                                                     | E      | -                              | 164.6                       |
|                                                                                     | F      | -                              | -                           |
| 4-fluorobenzoic acid                                                                | Carbon | $\delta^1\text{H}$ (ppm) [ppm] | $\delta^{13}\text{C}$ (ppm) |
|  | A      | -                              | 181.9                       |
|                                                                                     | B      | -                              | 129.1                       |
|                                                                                     | C      | 8.04                           | 135.1                       |
|                                                                                     | D      | 7.23                           | 118.4                       |
|                                                                                     | E      | -                              | 168.5                       |
|                                                                                     | F      | -                              | -                           |
